# Supplementary material for: Ultrathin oxygen deficient SnOx films as electron extraction layers for perovskite solar modules
Source: Royal Society of Chemistry journal article supplement (doi:10.1039/d4ta06871h), 2024-11-29
Supplement: d4ta06871h1.pdf [file d4ta06871h1.pdf]

## Supplementary Information

# Ultrathin Oxygen Deficient SnO<sub>x</sub> Films as Electron Extraction Layers for Perovskite Solar Modules

*Jin-Won Lee,<sup>1),†</sup> Joshua Sraqu Adu,<sup>1),2),†</sup> Raphael E. Agbenyeke,<sup>3)</sup> Jude Laverock,<sup>3)</sup> Alice Sheppard,<sup>3)</sup> Eunyoung Park,<sup>1)</sup> Youngwoong Kim,<sup>1),4)</sup> Soon Il Hong,<sup>1)</sup> Nam Joong Jeon,<sup>1),\*</sup> David J. Fermin,<sup>3),\*</sup> and Helen Hejin Park<sup>1),2),\*</sup>*

<sup>1)</sup> Advanced Materials Division, Korea Research Institute of Chemical Technology (KRICT), Daejeon, Republic of Korea 34114

<sup>2)</sup> Department of Advanced Materials and Chemical Engineering, University of Science and Technology (UST), Daejeon, Republic of Korea 34113

<sup>3)</sup> School of Chemistry, University of Bristol, Bristol BS8 1TL, United Kingdom

<sup>4)</sup> Green and Sustainable Materials R&D Department, Korea Institute of Industrial Technology (KITECH), Cheonan, Chungcheongnam-do 31056, Republic of Korea

## AUTHOR INFORMATION

<sup>†</sup> These authors contributed equally to this work.

## Corresponding Authors

\* E-mail: [hhpark@kRICT.re.kr](mailto:hhpark@kRICT.re.kr), [david.fermin@bristol.ac.uk](mailto:david.fermin@bristol.ac.uk), [njjeon@kRICT.re.kr](mailto:njjeon@kRICT.re.kr)

## S1. EXPERIMENTAL SECTION

### 1.1 Materials

Materials used in the experiments include, tin oxide (Alfa), home-made formamidinium lead iodide (FAPbI<sub>3</sub>) black powder (KRICT), home-made methylammonium bromide (MAPbBr<sub>3</sub>), methylammonium chloride (MACl, Sigma-Aldrich), poly(triarylamine) (PTAA) (MS Solution), *N,N*-dimethylformamide (DMF; 99.8%, Sigma-Aldrich), dimethyl sulfoxide (DMSO; 99.9%, Sigma-Aldrich), chlorobenzene (99.8%, Sigma-Aldrich), toluene (99.8%, Sigma-Aldrich), 2-methoxyethanol (2-ME; 99.8%, Sigma-Aldrich), ethanol (99.9%, DUKSAN PURE CHEMICALS), and ethylacetate (99.0%, DUKSAN PURE CHEMICALS).

### 1.2 Fabrication of perovskite unit cells

As transparent electrodes, glass/ITO (indium tin oxide on glass) substrates were prepared by cleaning with a special detergent followed by ultra-sonication in deionized (DI) water, acetone, and isopropyl alcohol. After drying, an ALD SnO<sub>x</sub> or nanoparticle SnO<sub>x</sub> (*np*-SnO<sub>x</sub>) was first deposited onto the precleaned ITO substrate. ALD SnO<sub>x</sub> was grown at 190°C in a commercial ALD system (CN-1, Atomic Premium). The precursors used were tetrakis(dimethylamino)tin (TDMASn) and deionized H<sub>2</sub>O for the tin and oxygen sources, respectively. The conventional thermal ALD cycle consisted of a dose of TDMASn for 0.5 s, followed by Ar purge of 10 s, followed by a dose of H<sub>2</sub>O for 0.1 s, and then Ar purge of 10 s. The plasma-modified ALD cycle as shown in **Figure 1a** was grown at 190°C. The technique consisted of a dose of TDMASn for 0.5 s, followed by Ar purge of 10 s, followed by a dose of Ar plasma for 3 s which is intended to remove ligands and activate the TDMASn surface, followed by Ar purge of 10 s, followed by a dose of TDMASn for 0.5 s, followed by Ar purge of 10 s, followed by a dose of H<sub>2</sub>O for 0.1 s, and then Ar purge of 10 s. ALD SnO<sub>x</sub> films were

grown for 79 cycles which is approximately 10 nm, and were post-annealed at 150°C for 1 h in air.

Nanoparticle SnO<sub>2</sub> (*np*-SnO<sub>2</sub>) solution (diluted with H<sub>2</sub>O to 2.5 wt%) were obtained from Alfa Aesar was coated by spin coating at 3000 rpm for 30 s, and the substrates were annealed on a hotplate at 150°C for 1 h. The perovskite solution was prepared by dissolving 800 mg of FAPbI<sub>3</sub>, 30 mg of MACl, and 30 mg of MAPbBr<sub>3</sub> in an DMF/DMSO (8:1 v/v) mixed solvent. The (FAPbI<sub>3</sub>)<sub>0.95</sub>(MAPbBr<sub>3</sub>)<sub>0.05</sub> perovskite solutions were spin-coated onto the ITO/SnO<sub>x</sub> substrates at 500 rpm for 5 s, 1000 rpm for 8 s, and 5000 rpm for 12 s, and the ethylacetate in the final spin-stage was dripped onto the substrate during spin coating. After that, the substrates were dried on a hotplate at 100°C for 1 h, 150°C for 4 min. PTAA solutions were prepared in toluene (10 mg/1 mL) with octylammonium bis(trifluoromethylsulfonyl)imide of 2.5 mg. PTAA solutions were spin-coated onto the ITO/SnO<sub>x</sub>/(FAPbI<sub>3</sub>)<sub>0.95</sub>(MAPbBr<sub>3</sub>)<sub>0.05</sub> substrates at 3000 rpm for 30 s. Finally, a metal electrode consisting of Au (80 nm) with an area of 9.94 mm<sup>2</sup> was deposited by thermal evaporation in a vacuum for all devices.

### **1.3 Fabrication of perovskite modules (9-stripe cells connected in series)**

The perovskite solar module composed of nine stripes in series on 7 × 7 cm<sup>2</sup> glass/ITO substrates patterned by a laser patterning system (EO TECHNICS). P1 lines were patterned by scribing to separate the ITO substrate with a power of 1.4 W. As transparent electrodes, glass/ITO (indium tin oxide on glass) substrates were prepared by cleaning with a special detergent followed by ultra-sonication in deionized (DI) water, acetone, and isopropyl alcohol. After drying, an ALD SnO<sub>x</sub> or nanoparticle SnO<sub>2</sub> (*np*-SnO<sub>2</sub>) was first deposited onto the precleaned ITO substrate. ALD SnO<sub>x</sub> was grown at 190°C in a commercial ALD system (CN-1, Atomic Premium). The precursors used were tetrakis(dimethylamino)tin (TDMASn) and deionized H<sub>2</sub>O for the tin and oxygen sources, respectively. The conventional thermal ALD

cycle consisted of a dose of TDMASn for 0.5 s, followed by Ar purge of 10 s, followed by a dose of H<sub>2</sub>O for 0.1 s, and then Ar purge of 10 s. The plasma-modified ALD cycle consisted of a dose of TDMASn for 0.5 s, followed by Ar purge of 10 s, followed by a dose of Ar plasma for 3 s, followed by Ar purge of 10 s, followed by a dose of TDMASn for 0.5 s, followed by Ar purge of 10 s, followed by a dose of H<sub>2</sub>O for 0.1 s, and then Ar purge of 10 s. ALD SnO<sub>x</sub> films were grown for 79 cycles which is approximately 10 nm, and were post-annealed at 150°C for 1 h in air.

For the modules, nanoparticle SnO<sub>x</sub> was coated by shearing (PCM-200, MITSUBISHI ELECTRIC) at 0.5 mm/s followed by thermal annealing at 100°C for 30 min. The perovskite solution was prepared by dissolving 800 mg of FAPbI<sub>3</sub>, 30 mg of MAcl, and 30 mg of MAPbBr<sub>3</sub> in an DMF/DMSO (8:1 v/v) mixed solvent. And then the perovskite solution were diluted using same solvent, with volume ratio with 1:0.2 (perovskite solution : solvent). The diluted (FAPbI<sub>3</sub>)<sub>0.95</sub>(MAPbBr<sub>3</sub>)<sub>0.05</sub> perovskite solutions were spin-coated onto the ITO/SnO<sub>x</sub> substrates at 500 rpm for 5 s, 1000 rpm for 8 s, and 3000 rpm for 10 s, and the ethylacetate in the final spin-stage was dripped onto the substrate during spin coating. After that, the substrates were dried on a hotplate at 100°C for 1 h, 150°C for 4 min. PTAA solutions were prepared in toluene (10 mg/1 mL) with octylammonium bis(trifluoromethylsulfonyl)imide of 2.5 mg. PTAA solutions were spin-coated onto the ITO/SnO<sub>x</sub>/(FAPbI<sub>3</sub>)<sub>0.95</sub>(MAPbBr<sub>3</sub>)<sub>0.05</sub> substrates at 3000 rpm for 30 s. ALD SnO<sub>x</sub>/np-SnO<sub>x</sub>/perovskite/PTAA layers were coated and P2 lines were scribed to expose the bottom ITO substrate to connect the series linkages between cells with a power of 1 W. Finally, Au electrodes formed by thermal evaporation and each sub-modules were separated by laser scribing to form P3 lines with a power of 0.12 W.

**1.4 Photocurrent density vs. voltage (*J-V*) measurements.** Illuminated *J-V* characteristics were measured using a Keithley 2420 sourcemeter. The standard 100 mW/cm<sup>2</sup> (1 SUN) illumination was generated by a Newport Oriel Class A 91195A solar simulator using a 450 W

Xe-lamp (Oriel) with an AM 1.5 G filter, while the light intensity was calibrated by a Si-reference cell certified by NREL. The  $J$ - $V$  curves were measured from 1.5 V to -0.2 V along the reverse scan direction, with a step voltage and scan speed fixed at 10 mV and 150 mV/s, respectively. All devices were measured with a metal mask with an active area of 0.094 cm<sup>2</sup>.

**1.5 Damp heat test (85°C and 85% relative humidity).** A climatic test was conducted in a chamber (C 4-340 E series, Votschtechnik), and was carried out in a chamber set to a constant temperature (85°C) and constant humidity (85%). The efficiency of the PSCs was measured under illumination at AM 1.5 G after removing the devices from the chamber and cooling them down to room temperature.

**1.6 Energy-filtered photoemission electron microscopy (EF-PEEM) analysis.** Energy-filtered photoemission electron microscopy (EF-PEEM) was performed under UHV conditions (base pressure of  $2 \times 10^{-11}$  mbar) in the Bristol Ultraquiet NanoESCA Laboratory. Prior to the analysis, the samples were sputtered with 0.5 kV Ar<sup>+</sup> ions ( $5 \times 10^{-5}$  mbar) at 45° for 2 minutes (total sputter flux of approximately 9 μA minutes) in a separate preparation chamber to remove surface contaminants. Following preparation, the samples were transferred into the EF-PEEM chamber equipped with a monochromated He I (21.2 eV) excitation light source. The measurements were carried out with an extraction field of 12 kV, 37.6 μm field of view, and at 50 eV pass energy (corresponding to a nominal instrument resolution of 100 meV). A 150 μm contrast aperture was inserted into the back focal plane to improve lateral resolution.

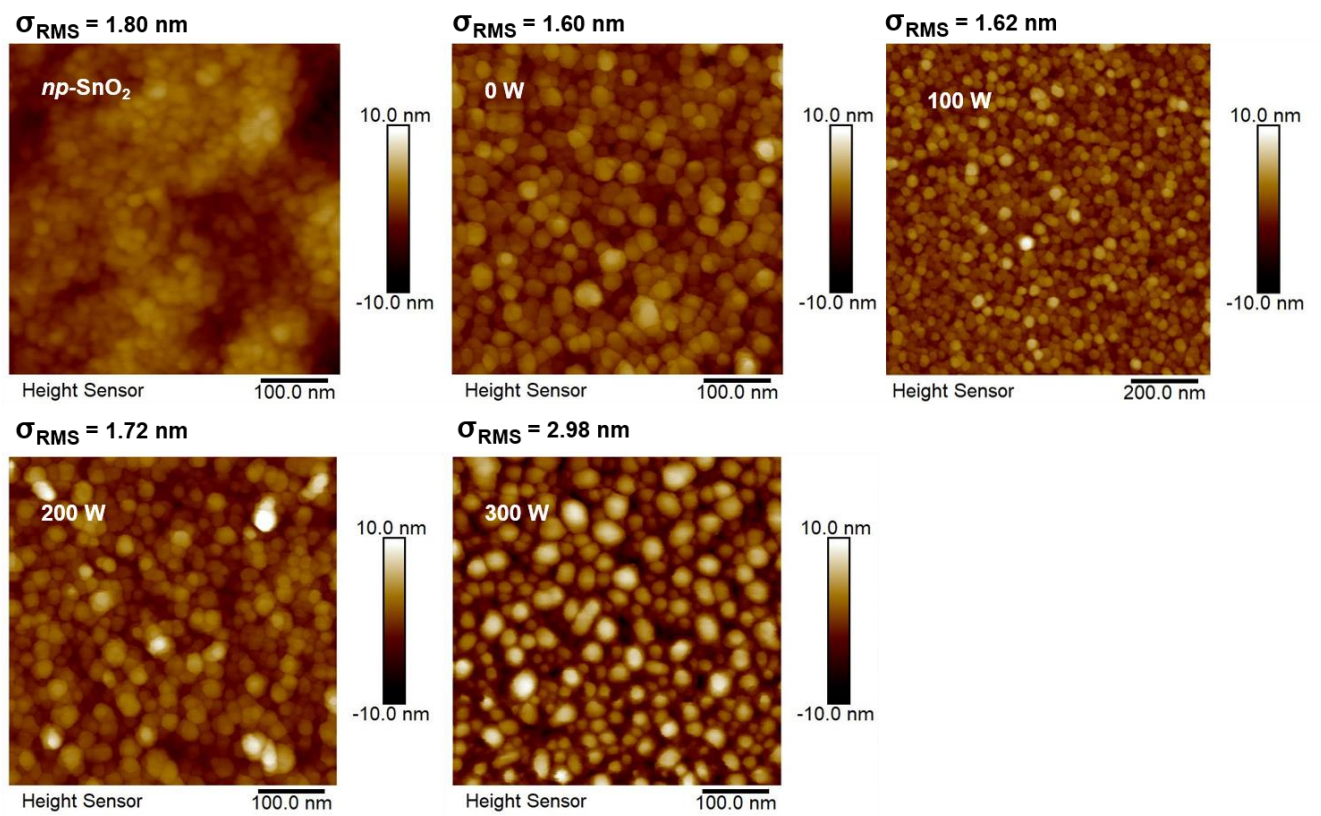

**Figure S1.** AFM images of the surfaces of the  $np\text{-SnO}_2$ , 0 W, 100 W, 200 W, and 300 W.

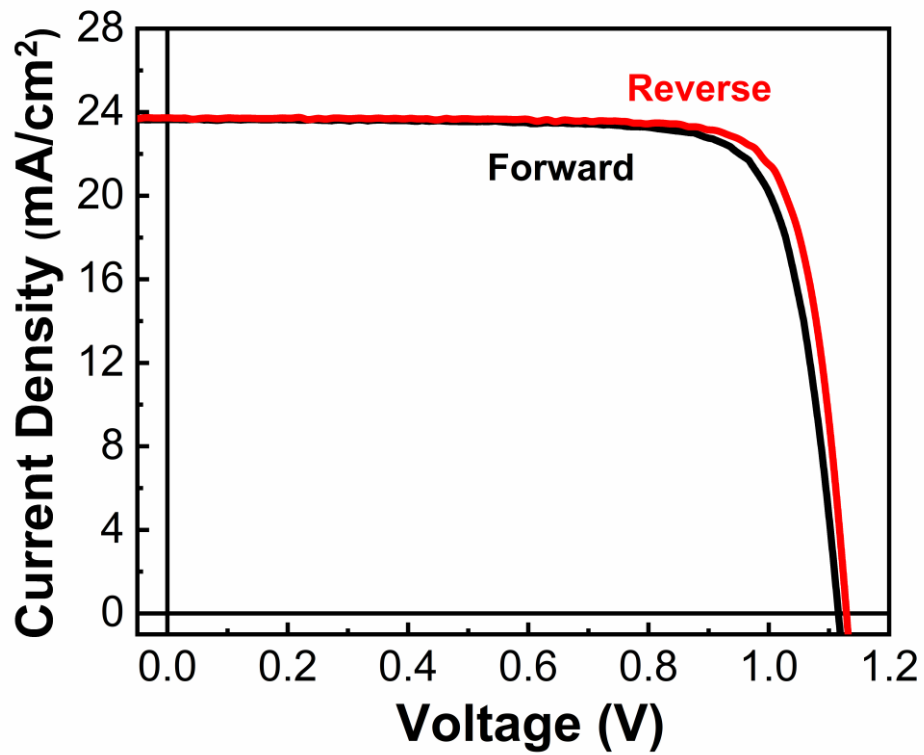

**Figure S2.** *J-V* characteristics of the photovoltaic device with PMALD SnO<sub>x</sub> layer (200 W) under 1 SUN for reverse and forward scans.

**Table S1.** The photovoltaic device parameters of PMALD SnO<sub>x</sub> (200 W) under forward and reverse scans.

|                | $V_{oc}$ (V) | $J_{sc}$ (mA/cm <sup>2</sup> ) | $FF$ (%) | $\eta$ (%) |
|----------------|--------------|--------------------------------|----------|------------|
| <b>Forward</b> | 1.11         | 23.6                           | 79.4     | 21.0       |
| <b>Reverse</b> | 1.13         | 23.7                           | 81.5     | 21.8       |

**Table S2. Photovoltaic parameters.** Average perovskite solar-cell performance values for with and without (reference) PMALD SnO<sub>x</sub> electron extraction layers deposited with various plasma power.

|           | $J_{SC}$ (mA/cm <sup>2</sup> ) | $V_{OC}$ (V) | $FF$ (%)   | $\eta$ (%) | $R_{SH}$ ( $\Omega \cdot \text{cm}^2$ ) | $R_S$ ( $\Omega \cdot \text{cm}^2$ ) |
|-----------|--------------------------------|--------------|------------|------------|-----------------------------------------|--------------------------------------|
| Reference | 23.4 ± 0.3                     | 1.07 ± 0.03  | 77.2 ± 0.9 | 19.4 ± 0.6 | 1.3 ± 1.8 × 10 <sup>4</sup>             | 3.6 ± 0.4                            |
| 0 W       | 23.6 ± 0.3                     | 1.11 ± 0.00  | 79.1 ± 0.4 | 20.7 ± 0.3 | 0.5 ± 0.3 × 10 <sup>4</sup>             | 3.0 ± 0.1                            |
| 100 W     | 23.3 ± 0.1                     | 1.11 ± 0.01  | 79.1 ± 1.0 | 20.4 ± 0.4 | 1.7 ± 1.5 × 10 <sup>4</sup>             | 2.9 ± 0.2                            |
| 200 W     | 23.4 ± 0.3                     | 1.13 ± 0.00  | 80.2 ± 0.9 | 21.1 ± 0.4 | 1.3 ± 1.5 × 10 <sup>4</sup>             | 2.8 ± 0.1                            |
| 300 W     | 23.2 ± 0.1                     | 0.98 ± 0.08  | 68.5 ± 3.7 | 15.6 ± 1.4 | 0.5 ± 0.1 × 10 <sup>4</sup>             | 6.2 ± 0.7                            |

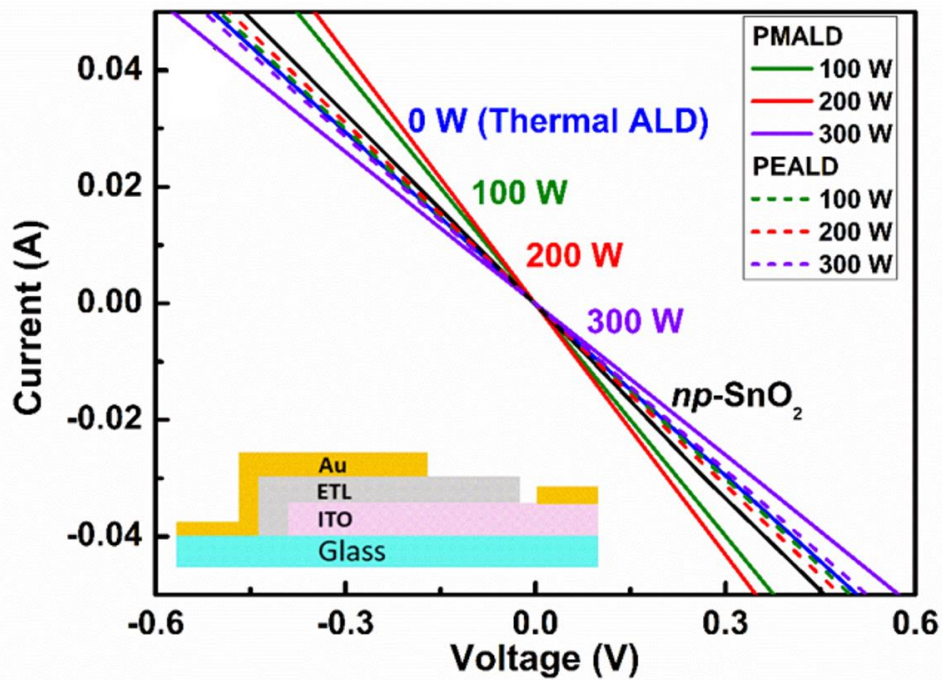

**Figure S3.** Current vs. voltage ( $I$ - $V$ ) scans of the glass/ITO/SnO<sub>x</sub>/Au stacks featuring nanoparticle SnO<sub>2</sub> films ( $np$ -SnO<sub>2</sub>) and SnO<sub>x</sub> layers by thermal ALD, PEALD, and PMALD with varying plasma power. These measurements clearly show that the conductance of  $np$ -SnO<sub>2</sub> spin coated films, thermal ALD and PEALD deposited SnO<sub>x</sub> obtained with different oxygen plasma powers are very similar ( $98.2 \pm 5.0$  mS). On the other hand, PMALD films show an increase in conductance with increasing plasma power from 137.9 mS (100 W) to 143.6 mS (200 W). Increasing the plasma power to 300 W leads to a decrease in the SnO<sub>x</sub> conductance to 86.7 mS.



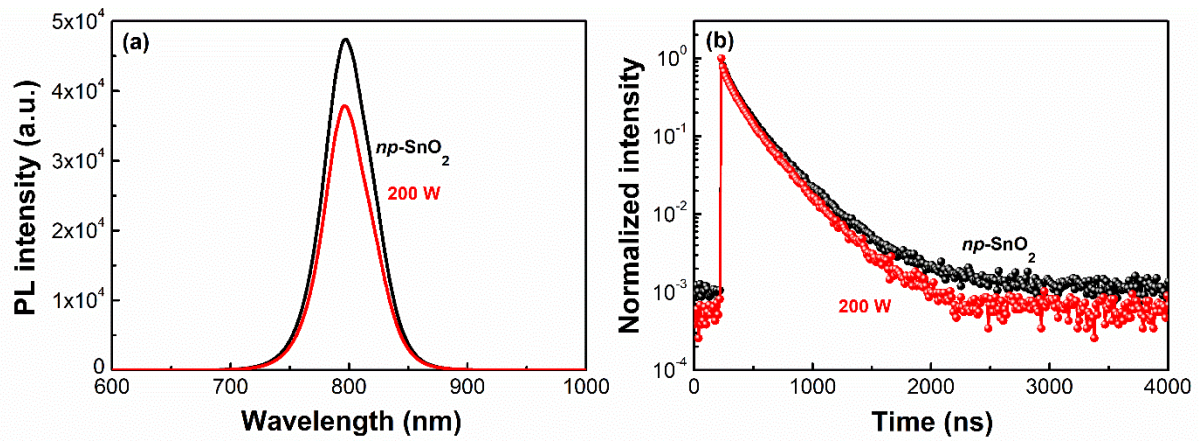

**Figure S4.** Steady-state photoluminescence (PL) (a) and time-resolved PL spectroscopy (b) of glass/ITO/ETL/perovskite samples with  $np$ -SnO<sub>2</sub> (Reference) and 200W PMALD SnO<sub>x</sub>. The PL intensity of the perovskite decreased for the PMALD SnO<sub>x</sub> with 200 W, in comparison to the reference case, strongly suggesting a more efficient electron extraction. The TRPL data was fitted to a double exponential decay with the fast decay ( $\tau_1$ ), associated with interfacial recombination of free carriers, and the slow decay ( $\tau_2$ ), linked to radiative decay. The TRPL decay times  $\tau_1$  and  $\tau_2$  are 301.3 and 109.2 ns, respectively, for the  $np$ -SnO<sub>2</sub> reference, whereas the decay times drop to 252.5 and 85.7 ns for the PMALD SnO<sub>x</sub> case with 200 W. Such reduction in the TRPL decay times indicate fast electron transfer from the perovskite film into the PMALD SnO<sub>x</sub> film, hence greatly suppressed carrier recombination, leading to enhanced  $V_{OC}$ .<sup>1</sup> The enhanced electron transfer from the perovskite film to the PMALD SnO<sub>x</sub> is possibly caused by reduced trap density in the perovskite<sup>2-7</sup> and the enhanced conductivity in the PMALD SnO<sub>x</sub> compared to the  $np$ -SnO<sub>2</sub> reference.

**Table S3. Photovoltaic parameters.** The photovoltaic device parameters of PMALD SnO<sub>x</sub> (200 W) with thickness optimization.

| PMALD SnO <sub>x</sub> 200 W         | $J_{SC}$ (mA/cm <sup>2</sup> ) | $V_{OC}$ (V) | $FF$ (%) | $\eta$ (%) |
|--------------------------------------|--------------------------------|--------------|----------|------------|
| 0 nm ( <i>np</i> -SnO <sub>2</sub> ) | 23.4                           | 1.10         | 77.2     | 19.9       |
| 5 nm                                 | 23.2                           | 1.10         | 79.7     | 20.2       |
| 10 nm                                | 23.6                           | 1.10         | 82.2     | 21.3       |
| 15 nm                                | 23.3                           | 1.10         | 81.1     | 20.7       |
| 20 nm                                | 23.3                           | 1.10         | 79.1     | 20.2       |

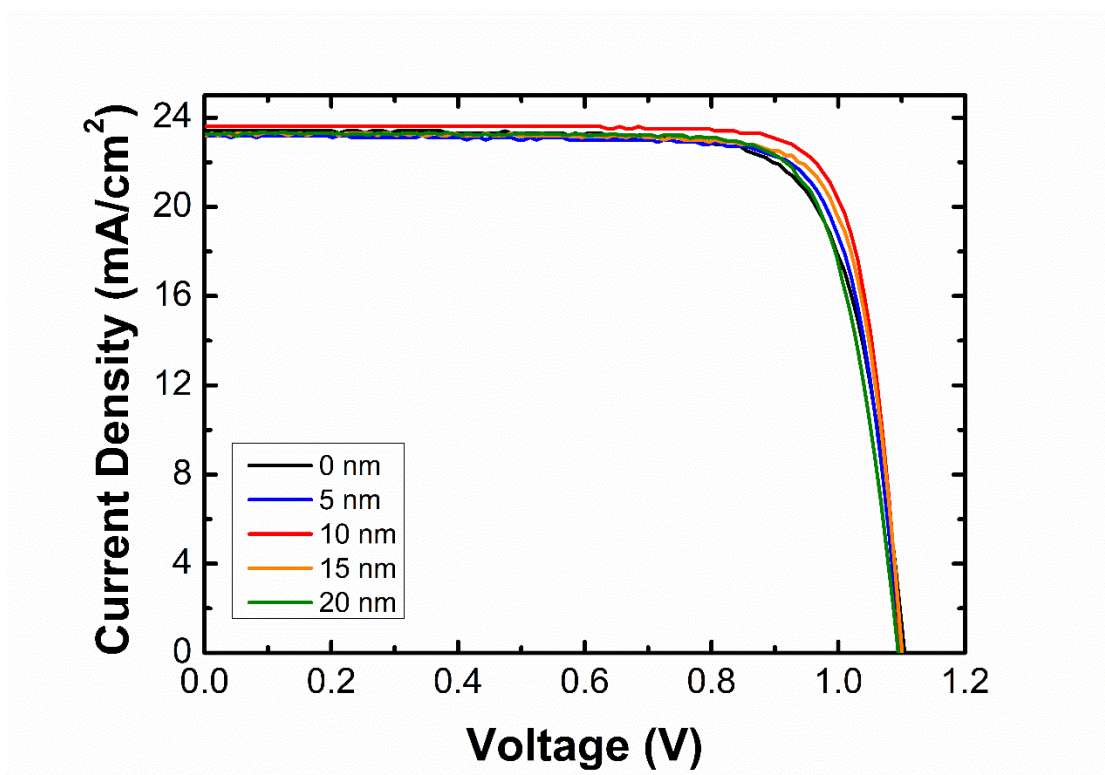

**Figure S5. Photovoltaic performance depending on thickness variation.** Current density vs. voltage ( $J$ - $V$ ) scans of PMALD SnO<sub>x</sub> with varying film thickness.

**Table S4.** Photovoltaic performance parameters of 5 cm × 5 cm modules with a *np*-SnO<sub>2</sub> layer (Reference) and a plasma-modified ALD SnO<sub>x</sub> layer (200 W) under 1 SUN.

|                             | $J_{SC}$ (mA/cm <sup>2</sup> ) | $V_{OC}$ (V) | $FF$ (%) | $\eta$ (%) | $R_{SH}$ ( $\Omega \cdot \text{cm}^2$ ) | $R_S$ ( $\Omega \cdot \text{cm}^2$ ) |
|-----------------------------|--------------------------------|--------------|----------|------------|-----------------------------------------|--------------------------------------|
| <i>np</i> -SnO <sub>2</sub> | 2.3                            | 11.1         | 71.0     | 17.9       | $1.3 \times 10^5$                       | $5.2 \times 10^2$                    |
| 200W PMALD                  | 2.4                            | 11.4         | 74.8     | 20.1       | $7.1 \times 10^5$                       | $4.5 \times 10^2$                    |

**Table S5.** Reports on the efficiency of perovskite solar modules.

| ETL                                | HTL         | Active area (cm <sup>2</sup> ) | $V_{oc}$ (V) | $J_{sc}$ (mA/cm <sup>2</sup> ) | FF (%)      | $\eta$ (%)  | Ref.                                                                             |
|------------------------------------|-------------|--------------------------------|--------------|--------------------------------|-------------|-------------|----------------------------------------------------------------------------------|
| SnO <sub>2</sub>                   | Spiro       | 15.03                          | 8.37         | 3.17                           | 77.97       | 20.71       | Angew. Chem.Int. Ed. <b>2024</b> , 63, e2023161. <sup>8</sup>                    |
| SnO <sub>2</sub>                   | Spiro       | 48.00                          | 11.00        | -                              | 69.00       | 18.80       | Chemical Engineering Journal <b>2023</b> , 456, 140894. <sup>9</sup>             |
| TiO <sub>2</sub>                   | PTAA        | 45.60                          | 16.07        | 1.52                           | 75.35       | 18.45       | Nat. Comm. <b>2022</b> , 89. <sup>10</sup>                                       |
| TiO <sub>2</sub>                   | PTAA        | 30.24                          | -            | -                              | -           | 20.99       | Joule <b>2022</b> , 6, 1689. <sup>11</sup>                                       |
| TiO <sub>2</sub>                   | Spiro       | 20.00                          | 12.15        | 2.29                           | 77.90       | 21.67       | Science <b>2022</b> , 375, 302. <sup>12</sup>                                    |
| TiO <sub>2</sub>                   | Spiro       | 24.63                          | 10.16        | 2.75                           | 82.00       | 22.87       | Nat. Nanotech. <b>2022</b> , 17, 598. <sup>13</sup>                              |
| -                                  | PTAA        | 27.14                          | 8.715        | 2.83                           | 75.41       | 18.60       | Nat. Energy <b>2021</b> , 6, 633. <sup>14</sup>                                  |
| -                                  | PTAA        | 18 (aperture)                  | 5.809        | 4.25                           | 78.00       | 19.3        | Science <b>2021</b> , 373, 902. <sup>15</sup>                                    |
| TiO <sub>2</sub>                   | PTAA        | 112                            | 7.64         | 2.51                           | 72.09       | 13.82       | Joule <b>2021</b> , 5, 481-494. <sup>16</sup>                                    |
| TiO <sub>2</sub>                   | Spiro       | 23.27                          | -            | -                              | 78.5        | 20.75       | Energy Environ. Sci. <b>2021</b> , 14, 4903. <sup>17</sup>                       |
| TiO <sub>2</sub>                   | PTAA        | 42.8                           | 16.05        | 1.49                           | 70.9        | 17.05       | Nano Energy, <b>2021</b> , 82, p.105685. <sup>18</sup>                           |
| TiO <sub>2</sub>                   | Spiro       | 52                             | 12.03        | -                              | 54.9        | 11.6        | Solar Energy Materials and Solar Cells, <b>2021</b> , 230, 111189. <sup>19</sup> |
| TiO <sub>2</sub> /SnO <sub>2</sub> | Spiro       | 21                             | 6.71         | 3.68                           | 73.44       | 18.13       | Joule <b>2020</b> , 4, 1035. <sup>20</sup>                                       |
| SnO <sub>2</sub>                   | Spiro       | 13.8                           | -            | -                              | -           | 13.1        | Solar Energy Materials and Solar Cells, <b>2018</b> , 185, 136. <sup>21</sup>    |
| SnO <sub>2</sub>                   | PTAA        | 16.07                          | 6.54         | 3.30                           | 69.00       | 14.89       | Nature Communications, <b>2018</b> , 9, 4609. <sup>22</sup>                      |
| TiO <sub>2</sub>                   | Spiro       | 36.1                           | 10.2         | 1.97                           | 75.7        | 15.7        | Nature, <b>2017</b> , 550(7674), pp.92-95. <sup>23</sup>                         |
| TiO <sub>2</sub>                   | PTAA        | 40                             | 10.5         | 2.10                           | 70.16       | 15.5        | J. Mater. Chem. A, <b>2016</b> , 4, 17636-17642. <sup>24</sup>                   |
| <b>SnO<sub>2</sub></b>             | <b>PTAA</b> | <b>23.2</b>                    | <b>11.3</b>  | <b>2.4</b>                     | <b>74.8</b> | <b>20.1</b> | <b>This work</b>                                                                 |

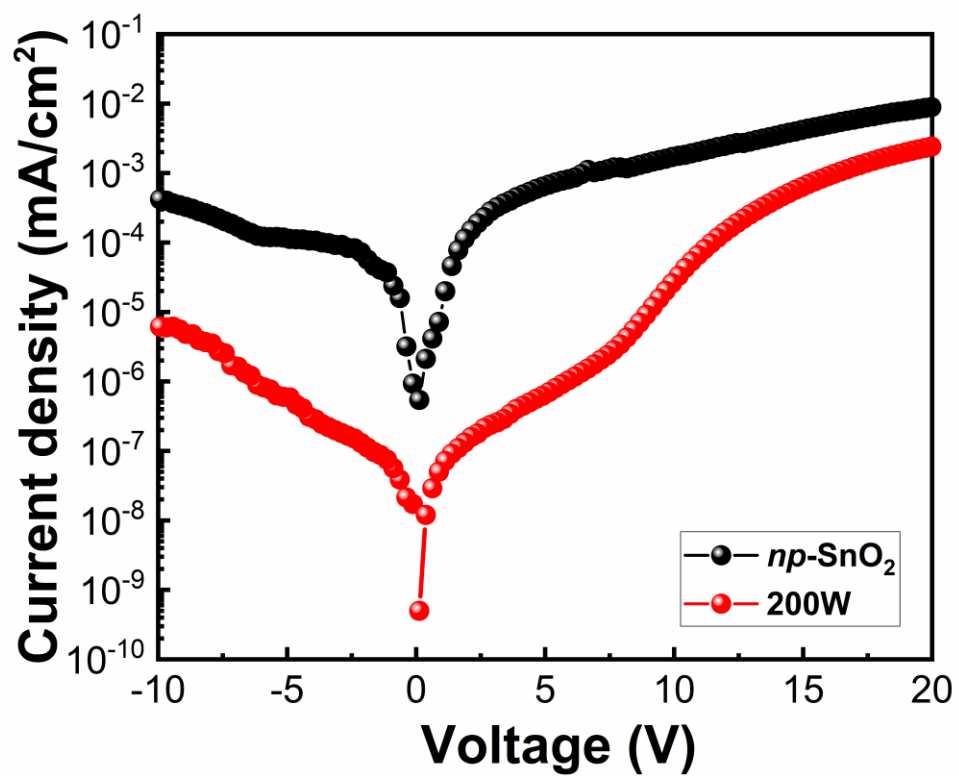

**Figure S6. Module dark  $J$ - $V$  curves.** 5 cm  $\times$  5 cm modules with a  $np$ -SnO<sub>2</sub> layer (Reference) and upon including a 200 W PMALD SnO<sub>x</sub> electron extraction layer.

## References

1. Q. Liu, X. Zhang, C. Li, H. Lu, Z. Weng, Y. Pan, W. Chen, X. -C. Hang, Z. Sun, Y. Zhan, *Appl. Phys. Lett.* 2019, **115**, 143903.
2. J. Jiang, Q. Wang, Z. Jin, X. Zhang, J. Lei, H. Bin, Z. -G. Zhang, Y. Li, S. Liu, *Adv. Energy Mater.* 2018, **8**, 1701757.
3. M. Ding, L. Sun, X. Chen, T. Luo, T. Ye, C. Zhao, W. Zhang, H. Chang, *J. Mater. Sci.* 2019, **54**, 12000.
4. T. Niu, J. Lu, R. Munir, J. Li, D. Barrit, X. Ahang, H. Hu, Z. Yang, A. Amassian, K. Zhao, S. Liu, *Adv. Mater.* 2018, **30**, 1706576.
5. X. Meng, J. Lin, X. Liu, X. He, Y. Wang, T. Noda, T. Wu, X. Yang, L. Han, *Adv. Mater.* 2019, **31**, 1903721.
6. S. Song, E. Y. Park, B. S. Ma, D. J. Kim, H. H. Park, Y. Y. Kim, S. S. Shin, N. J. Jeon, T. -S. Kim, J. Seo, *Adv. Energy Mater.* 2021, **11**, 2003382.
7. M. T. Mbumba, D. M. Malouangou, J. M. Tsiba, M. W. Akram, L. Bai, Y. Yang, M. Guli, *J. Mater. Chem. C* 2021, **9**, 14047-14064.
8. H. Yang, T. Xu, W. Chen, Y. Wu, X. Guo, Y. Shen, C. Ding, X. Chen, H. Chen, J. Ding, X. Wu, G. Zeng, Z. Zhang, Y. Li, Y. Li, *Angew. Chem.Int. Ed.* 2024, **63**, e2023161.
9. P. Lv, Y. Yang, N. Li, Y. Zhang, M. Hu, B. Huang, Y. Zhu, Y. Wang, J. Pan, S. Wang, B. Zhang, F. Huang, Y. -B. Cheng, J. Lu, *Chemical Engineering Journal* 2023, **456**, 140894.
10. H. Zhang, K. Darabi, N. Y. Nia, A. Krishna, P. Ahlawat, B. Guo, M. H. S. Almalki, T. -S. Su, D. Ren, V. Bolnykh, L. A. Castriotta, M. Zendehtdel, L. Pan, S. S. Alonso, R. Li, S. M. Zakeeruddin, A. Hagfeldt, U. Rothlisberger, A. D. Carlo, A. Amassian, M. Gratzel, *Nat. Comm.* 2022. **89**.

11. J. Xia, Y. Zhang, C. Xiao, K. G. Brooks, M. Chen, J. Luo, H. Yang, N. I. D. Klipfel, J. Zou, Y. Shi, X. Yao, J. Chen, J. M. Luther, H. Lin, A. M. Asiri, C. Jia, M. K. Nazeeruddin, *Joule* 2022, **6**, 1689.
12. M. Kim, J. Jeong, H. Lu, T. K. Lee, F. T. Eickemeyer, Y. Liu, I. W. Choi, S. J. Choi, Y. Jo, H. -B. Kim, S. -I. Mo, Y. -K. Kim, H. Lee, N. G. An, S. Cho, W. R. Tress, S. M. Zakeeruddin, A. Hagfeldt, J. Y. Kim, M. Gratzel, D. S. Kim, *Science* 2022, **375**, 302.
13. Y. Ding, B. Ding, H. Kanda, O. J. Usiobo, T. Gallet, Z. Yang, Y. Liu, H. Huang, J. Sheng, C. Liu, Y. Yang, V. I. E. Queloz, X. Zhang, J. N. Audinot, A. Redinger, W. Dang, E. Mosconi, W. Luo, F. D. Angelis, M. Wang, P. Dorflinger, M. Armer, V. Schmid, R. Wang, K. G. Brooks, J. Wu, V. Dyakonov, G. Yang, S. Dai, P. J. Dyson, M. K. Nazeeruddin, *Nat. Nanotech.* 2022, **17**, 598.
14. Y. Deng, S. Xu, S. Chen, X. Xia, J. Zhao, J. Huang, *Nat. Energy* 2021, **6**, 633.
15. S. Chen, X. Dai, S. Xu, H. Jiao, L. Zhao, J. Huang, *Science* 2021, **373**, 902.
16. J. H. Heo, F. Zhang, C. Xiao, S. J. Heo, J. K. Park, J. J. Berry, K. Zhu, S. H. Im, *Joule* 2021, **5**, 481-494.
17. J. Zhu, S. Park, O. Y. Gong, C. Sohn, Z. Li, Z. Zhang, B. Jo, W. Kim, G. S. Han, D. H. Kim, T. K. Ahn, J. Lee, H. S. Jung, *Energy Environ. Sci.* 2021, **14**, 4903.
18. N. Y. Nia, M. Zendejdel, M. Abdi-Jalebi, L. A. Castriotta, F. U. Kosasih, E. Lamanna, M. M. Abolhasani, Z. Zheng, Z. Andaji-Garmaroudi, K. Asadi, G. Divitini, C. Ducati, R. H. Friend, A. D. Carlo, *Nano Energy* 2021, **82**, p.105685.
19. M. Fievez, P. J. S. Rana, Koh, T. M. Manceau, J. H. Lew, N. F. Jamaludin, B. Ghosh, A. Bruno, S. Cros, S. Berson, S. G. Mhaisalkar, W. L. Leong, *Solar Energy Materials and Solar Cells* 2021, **230**, 111189.
20. J. Li, H. Wang, X. Y. Chin, H. A. Dewi, K. Vergeer, T. W. Goh, J. W. M. Lim, J. H. Lew, K. P. Loh, C. Soci, T. C. Sum, H. J. Bolink, N. Mathews, S. Mhaisalkar, A.

- Bruno, *Joule* 2020, **4**, 1035.
21. E. Calabro, F. Matteocci, A. L. Palma, L. Vesce, B. Taheri, L. Carlini, I. Pis, S. Nappini, J. Dagar, C. Battocchio, T. M. Brown, A. D. Carlo, *Solar Energy Materials and Solar Cells* 2018, **185**, 136.
  22. T. Bu, J. Li, F. Zheng, W. Chen, X. Wen, Z. Ku, Y. Peng, J. Zhong, Y. -B. Cheng, F. Huang, *Nature Communications* 2018, **9**, 4609.
  23. H. Chen, F. Ye, W. Tang, J. He, M. Yin, Y. Wang, F. Xie, E. Bi, X. Yang, M. Gratzel, L. Han, *Nature* 2017, **550(7674)**, pp.92-95.
  24. J. H. Heo, M. H. Lee, M. H. Jang, S. H. Im, *J. Mater. Chem. A* 2016, **4**, 17636-17642.
